# Supplementary material for: Reovirus Type 3 Dearing Variants Do Not Induce Necroptosis in RIPK3-Expressing Human Tumor Cell Lines
Source: Int J Mol Sci. 2023 Jan 24;24(3):2320. doi: 10.3390/ijms24032320 (PMC9916669; doi:10.3390/ijms24032320)
Supplement: Supplementary file 1 [file ijms-24-02320-s001.zip › Table S1.xlsx]

## Sheet: Sheet1
Tabel S1	Amino acid differences between the three reoviruses used in this study
AA#	T3DK	R124	Jin-1
Lambda-3 (L1) RNA-dependent RNA polymerase
413	Ile	Ile	Ser
1048	Asn	Ser	Ser
1186	Ser	Pro	Ser
Lambda-2 (L2) Guanylyltransferase & 5'-capping
504	Gly	Glu	Glu
1101	Met	Met	Ile
1165	Ile	Met	Ile
Lambda-1 (L3) NTPase, RTPase & Helicase
201	Ala	Thr	Ala
500	Ile	Ser	Ser
574	Ala	Thr	Ala
982	Met	Val	Met
1017	Gly	Asp	Gly
Mu2 (M1) Microtuble associated, inclusion bodies
208	Ser	Pro	Pro
342	Arg	Gln	Gln
Mu1 (M2) Host cell penetration
305	Ala	Val	Val
388	Lys	Lys	Arg
529	Ala	Thr	Ala
MuNS (M3) ssRNA binding Involved in inclusion bodies (?)
180	Lys	Glu	Glu
705	Ala	Ala	Val
706	Asp	Asp	Ala
Sigma-1 (S1) Attachment protein
193	Thr	Thr	Met
336	Gln	Gln	Arg
408	Thr	Ala	Ala
Sigma-2 (S2) Inner capsid protein
254	Ser	Ser	Phe
SigmaNS (S3) ssRNA binding; Genome packaging (?)
No amino-acid differences
Sigma3 (S4) Blocking PKR & interferon response; Important during proteolytic cleavage process
177	Ser	Ser	Phe
198	Gly	Gly	Glu
357	Met	Met	Thr
